# Supplementary material for: The small molecule tool (S)-(−)-blebbistatin: novel insights of relevance to myosin inhibitor design
Source: Royal Society of Chemistry journal article supplement (doi:10.1039/b801223g), 2008-01-01
Supplement: b801223g.pdf [file b801223g.pdf]

## Supplementary Material

### The small molecule tool (*S*)-(-)-Blebbistatin: novel insights of relevance to myosin inhibitor design

Cristina Lucas-Lopez<sup>1†</sup>, John S. Allingham<sup>2†</sup>, Tomas Lebl<sup>1</sup>, Christopher P.A.T. Lawson<sup>1</sup>,  
Ruth Brenk<sup>3</sup>, James R. Sellers<sup>4</sup>, Ivan Rayment<sup>2\*</sup>, Nicholas J. Westwood<sup>1\*</sup>

Page 1 – More detailed discussion regarding cyclisation of **11** (Figure S1)

Page 2 – Biological activity of (*S*)-(-)-blebbistatin analogues (Table S1)

Page 3 - Data collection and refinement statistics for the co-crystal structures of S1dC with **4-7** (Table S2).

**Figure S1** – Cyclisation of amidine **11** to give quinolone **16** was observed to be slow compared with the equivalent reaction for the other amidine analogues. A possible reason may be the preferred formation of the lithium enolate **S1b** conformer formed on deprotonation of **11** by LiHMDS as shown below based on the assumption that the N-Li group is the largest group due to formation of an (NLi)<sub>n</sub> aggregate.

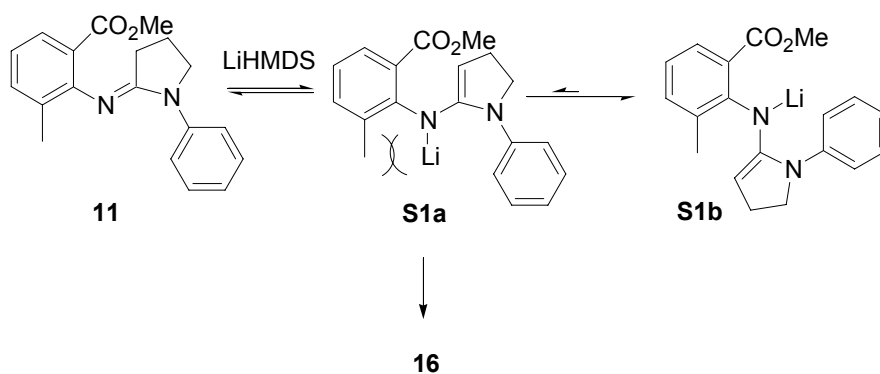

**Table S1.** Observed percentage of maximal ATPase activity as a function of chemical structure against rabbit skeletal myosin S1 fragment at a concentration of 5 and 50 $\mu$ M and *Dictyostelium* myosin II S1dC fragment at 50 $\mu$ M. No inhibition was observed by any of the analogues at 5 $\mu$ M with the S1dC fragment. <sup>a</sup> number in parentheses is the standard deviation assessed for n = 3.

| Analogue | SkS1                   |            | S1dC       |
|----------|------------------------|------------|------------|
|          | 5 $\mu$ M              | 50 $\mu$ M | 50 $\mu$ M |
| <b>1</b> | 6.6 (1.2) <sup>a</sup> | 3.0 (1.5)  | 8.5        |
| <b>4</b> | 13.9 (0.9)             | 4.6 (0.1)  | 12.2       |
| <b>5</b> | 14.5 (1.2)             | 5.9 (1.3)  | 10         |
| <b>6</b> | 69.2 (9.2)             | 28.2 (2.3) | 65         |
| <b>7</b> | 16.5 (1.3)             | 4.8 (0.7)  | 11.7       |

**Table S2.** Data collection and refinement statistics for the co-crystal structures

|                                       | 4                  | 5                 | 6                   | 7                     |
|---------------------------------------|--------------------|-------------------|---------------------|-----------------------|
| <b>Data collection</b>                |                    |                   |                     |                       |
| Space group                           | C222 <sub>1</sub>  | C222 <sub>1</sub> | C222 <sub>1</sub>   | C222 <sub>1</sub>     |
| Cell dimensions<br><i>a, b, c</i> (Å) | 88.2, 146.0, 153.1 | 88, 147.8, 153.4  | 87.8, 145.4, 152.8  | 88.7, 146.3,<br>154.1 |
| $\alpha, \beta, \gamma$ (°)           | 90,90,90           | 90,90,90          | 90, 90, 90          | 90,90,90              |
| Resolution (Å)                        | 50-2.0 (2.07-2.0)  | 50-2.2 (2.28-2.2) | 50-2.15 (2.23-2.15) | 50-2.1 (2.18-<br>2.1) |
| $R_{\text{merge}}$                    | 7.1 (23.4)         | 7.3 (22.4)        | 7.7 (26.9)          | 6.7 (27.2)            |
| $I / \sigma I$                        | 24.3 (5.1)         | 20.1 (4.9)        | 19.5 (4.4)          | 23.4 (4.3)            |
| Completeness (%)                      | 99.9 (99.7)        | 99.1 (94.8)       | 99.7 (99.6)         | 98.4 (98.8)           |
| Redundancy                            | 5.3 (4.8)          | 5.7 (4.5)         | 4.9 (4.8)           | 5.6 (5.5)             |
| <b>Refinement</b>                     |                    |                   |                     |                       |
| Resolution (Å)                        | 50-2.0 (2.07-2.0)  | 50-2.2 (2.28-2.2) | 50-2.15 (2.23-2.15) | 50-2.1 (2.18-<br>2.1) |
| No. reflections                       | 353590 (66638)     | 288277 (50604)    | 257141 (52873)      | 322203 (57734)        |
| $R_{\text{work}} / R_{\text{free}}$   | 0.183/0.223        | 0.192/0.244       | 0.174/0.219         | 0.191/0.238           |
| No. atoms                             |                    |                   |                     |                       |
| S1dC                                  | 5561               | 5529              | 5529                | 5587                  |
| Blebbistatin                          | 22                 | 22                |                     | 21                    |
| MgADP-Vanadate                        | 33                 | 33                | 33                  | 33                    |
| Water                                 | 728                | 597               | 583                 | 500                   |
| <i>B</i> -factors                     |                    |                   |                     |                       |
| S1dC                                  | 25.0               | 34.9              | 23.6                | 28.9                  |
| Blebbistatin                          | 20.6               | 35.8              |                     | 19.3                  |
| MgADP-Vanadate                        | 14.1               | 22.9              | 12.3                | 15.7                  |
| Water                                 | 39.0               | 41.6              | 31.8                | 35.1                  |
| R.m.s deviations                      |                    |                   |                     |                       |
| Bond lengths (Å)                      | 0.016              | 0.022             | 0.017               | 0.02                  |
| Bond angles (°)                       | 1.39               | 1.826             | 1.489               | 1.605                 |

Data for each S1dC-Blebbistatin Analogue complex was collected from a single crystal. \*Highest resolution shell is shown in parenthesis.
